# Supplementary material for: Genetic manipulation of an Ixodes scapularis cell line
Source: PubMed Central journal article supplement (PMC10936194; doi:10.1128/mbio.02479-23), 2024-02-21
Supplement: mbio.02479-23-s0001.pdf [file mbio.02479-23-s0001.pdf]

1 **Supplementary Information**

2 Materials and Methods

3 Supplementary Figures and Legends

4 Figures S1 to S5; Tables S1 to S2

5

6 **Genetic manipulation of an *Ixodes scapularis* cell line**

7

8 **Authors:** Nisha Singh<sup>1α</sup>, Agustin Rolandelli<sup>1</sup>, Anya J. O'Neal<sup>1\*</sup>, L. Rainer Butler<sup>1†</sup>, Sourabh  
9 Samaddar<sup>1</sup>, Hanna J. Laukaitis-Yousey<sup>1</sup>, Matthew Butnaru<sup>2,3</sup>, Stephanie E. Mohr<sup>2</sup>, Norbert  
10 Perrimon<sup>2,3</sup> and Joao H. F. Pedra<sup>1#</sup>

11

12 **Affiliations:** <sup>1</sup>Department of Microbiology and Immunology, University of Maryland, School of  
13 Medicine, Baltimore, MD 21201, USA

14 <sup>2</sup>Department of Genetics, Blavatnik Institute, Harvard Medical School, Boston, MA 02115, USA

15 <sup>3</sup>Howard Hughes Medical Institute, Chevy Chase, MD, 20815, USA

16

17 <sup>α</sup>Present address: Department of Biotechnology, School of Energy Technology, Pandit  
18 Deendayal Energy University Knowledge Corridor, Gandhinagar, Gujarat 382426, India

19

20 <sup>\*</sup>Present address: Immunology Program, Memorial Sloan Kettering Cancer Center, New York,  
21 NY 10065, USA

22

23 <sup>†</sup>Present address: Department of Genetics, Blavatnik Institute, Harvard Medical School, Boston,  
24 MA 02115, USA

25

26 <sup>#</sup>Corresponding Author: [jpegra@som.umaryland.edu](mailto:jpegra@som.umaryland.edu)

27  
28  
29  
30  
31  
32  
33  
34  
35  
36  
37  
38  
39  
40  
41  
42  
43  
44  
45  
46  
47  
48  
49  
50  
51  
52

## Materials and Methods

### Tick cell culture

All experiments were performed under guidelines from the NIH and approved by the Institutional Biosafety Committee (IBC-00002247) at the University of Maryland, Baltimore. The embryonic cell line (ISE6) was cultured at 34°C in L15C300 medium supplemented with 10% heat inactivated fetal bovine serum (FBS, Millipore Sigma), 0.1% bovine lipoprotein concentrate (LPPC, MP Biomedicals) and 10% tryptose phosphate broth (TPP, BD). ISE6 cells were grown to confluency in T25 flasks (Greiner) and verified by PCR to be *Mycoplasma* free (Southern Biotech).

### Plasmids

*xiap* and *p47* were cloned in the pCMV-HA and pCMV-FLAG vectors, respectively, as previously described (1). For confocal microscopy, *xiap* and *p47* were cloned in DsRed2-N1(a gift from Michael Davidson, Addgene plasmid #54493) and pAQUA-N1vectors (a gift from Fabienne Merola, Addgene plasmid #42888). Genes of interest were amplified from ISE6 cells complementary DNA (cDNA) using Phusion polymerase (NEB Biolabs). *xiap* and *p47* were cloned between the restriction sites *SacII/EcoRI* and *Sall/BamHI*, respectively. The *xiap*- and *p47*- donor DNA used in CRISPR experiments were procured from Origene technologies with a customized RFP-Puro cassette. All constructs were verified through Sanger sequencing.

### Bacteria

*Escherichia coli* BL21 (DE3) was cultured overnight at 37°C in lysogeny broth (LB) supplemented with 100 µg/ml ampicillin. *A. phagocytophilum* strain HZ was cultured in the human leukemia cell line, HL-60 cell line (ATCC, CCL-240) (2). Host-free *A. phagocytophilum* was obtained by collecting the infected-HL-60 cells at 3,260 x g for 10 minutes. The pellet was resuspended in L15C300 medium and lysed by passing through a 27 ½ gauge needle five

53 times. Cell debris was separated by centrifugation at 750 x g for 5 minutes at 4°C. Host-free  
54 bacteria were enumerated using the following formula: number of infected HL-60 cells × 5  
55 morulae/cell × 19 bacteria/morulae × 0.5 recovery rate (3). Low passage *B. burgdorferi* B31  
56 clone MSK5 was cultured in Barbour-Stoenner-Kelly (BSK)-II medium supplemented with 6%  
57 normal rabbit serum at 37°C, as previously described (4, 5). The *B. burgdorferi* genome consists  
58 of 21 linear and circular plasmids, which are important for infectivity in mice. Total DNA was  
59 extracted from a liquid culture and plasmid profiling was performed by PCR amplification of  
60 necessary virulence plasmids using REDTaq DNA polymerase (4).

61

## 62 **Antibody generation**

63 The *I. scapularis* Kenny custom antibody used in this study was generated by Genscript.  
64 Rabbits were immunized three times with 0.2 mg of the tick Kenny immunogen (amino acids  
65 223-356) for antibody generation. The *I. scapularis* Relish monoclonal custom antibody used in  
66 this study was generated by Genscript. Mice were immunized three times with 0.2 mg of the tick  
67 N-Rel immunogen (Rel homology domain; amino acids 19-192).

68

## 69 **Nucleofection**

70 For nucleofection,  $2 \times 10^5$  ISE6 cells were pelleted by centrifugation at 100 x g for 10  
71 minutes. The pellet was washed with 10 ml of 1 x PBS and resuspended in 20 µl of  
72 nucleofection SF buffer (Lonza Biosciences), in which 600 ng of the DsRed2-N1 plasmid was  
73 added to the suspension. The nucleofection mix was transferred to a multi-well cuvette and  
74 subjected to the EN150 pulse condition using a 4D-Nucleofector system (Lonza Biosciences).  
75 Following nucleofection, cells were incubated in the cuvette for 10 minutes at room temperature.  
76 ISE6 cells were added to pre-warmed L15C complete media in a 12-well plate and observed for  
77 fluorescence by microscopy after 72 hours (6).

78

79 **Pull-down assays**

80 Following nucleofection of  $4 \times 10^8$  ISE6 cells, the pellet was resuspended in 800  $\mu$ l of SF  
81 buffer. Twenty-five  $\mu$ g of either *p47-FLAG* or *xiap-HA* plasmids was added to the cell  
82 suspension. The cell suspension was split among eight nucleofection cuvettes (100  $\mu$ l each)  
83 and pulsed using EN150. After 10 minutes post-nucleofection, tick cells were added to a T25  
84 flask containing 5 ml of pre-warmed L15C complete medium and incubated at 34 °C with 1%  
85 CO<sub>2</sub> for 72 hours. Cells were collected, washed twice with 1 x PBS, and lysed in  
86 immunoprecipitation lysis buffer (Thermo Scientific). The lysate (10 mg) was incubated with 300  
87  $\mu$ l of anti-FLAG cross-linked agarose beads overnight at 4°C. Beads were washed three times  
88 with 200 mM NaCl added to 1 x PBS and boiled for 5 minutes in 2X Laemmli buffer to elute  
89 proteins. Eluted proteins and input samples were analyzed by western blot for XIAP-HA and  
90 p47-FLAG detection.

91

92 **Confocal microscopy**

93 For microscopy,  $5 \times 10^5$  ISE6 cells were nucleofected with 500 ng of plasmid (*xiap-*  
94 *DsRed-N1* or *p47-AQUA-N1*). Tick cells were then plated on a glass coverslip (Corning). After  
95 72 hours, cells were stained with the molecular dyes (Supplementary Table 1), as per the  
96 manufacturer's protocol. ISE6 cells were fixed with 4% paraformaldehyde followed by 1 x PBS  
97 washes and the coverslip was mounted on a slide using Antifade gold mounting reagent with  
98 4',6-diamidino-2-phenylindole (DAPI) (Invitrogen) and observed under the Nikon W-1 Spinning  
99 Disk confocal microscope. The following laser channels were used: 561 nm (XIAP-DsRed), 488  
100 nm (GFP, plasma membrane, lysosomes, mitochondria, and endoplasmic reticulum), 405 nm  
101 (DAPI), 456 nm (p47-AQUA) and 561 nm (RFP, Golgi apparatus).

102

103 **Subcellular fractionation**

104 Subcellular fractionation was performed as previously described (7). Briefly, ISE6 cells  
105 were resuspended in 500 µl fractionation buffer and passed through a 27-gauge needle 10  
106 times. After a 20-minute incubation on ice, the cells were centrifuged at 720 x g for 5 minutes.  
107 The pellet comprised of nuclei and the supernatant contained cytoplasm and membranes. The  
108 nuclear pellet was resuspended in 500 µl fractionation buffer and passed through a 25-gauge  
109 needle 10 times. The sample was then centrifuged at 720 x g for 10 minutes and resuspended  
110 in TBS with 0.1% Sodium dodecyl sulfate (SDS). The fraction containing cytoplasm and  
111 membrane components was centrifuged at 10,000 x g for 5 minutes and the supernatant was  
112 collected. The supernatant was then ultra-centrifuged at 100,000 x g for 1 hour. The pellet was  
113 washed in 400 µl of fractionation buffer, passed through 25-gauge needle and re-centrifuged at  
114 100,000 x g for 45 minutes. The membrane pellet was resuspended in TBS containing 0.1 %  
115 Sodium dodecyl sulfate (SDS) for western blot detection.

116

### 117 **sgRNA and donor DNA design**

118 Amplicons were validated using Sanger sequencing and aligned to the reference  
119 genome. Exons were identified using the ORF finder tool  
120 ([https://www.bioinformatics.org/sms2/orf\\_find.html](https://www.bioinformatics.org/sms2/orf_find.html)). Exon 3 for *xiap* and exon 5 for *p47* were  
121 selected. The CHOPCHOP server (<https://chopchop.cbu.uib.no/>) was used to identify guide  
122 RNA hits. The sgRNAs were selected based on the ~20 bp sequences adjacent to NGG-PAM  
123 (protospacer adjacent motif) with 40-80% GC content and no off-target binding. The sgRNA  
124 scaffold contained the CRISPR RNA (crRNA) or the ~20 bp target sequence, as well as the  
125 transactivating CRISPR RNA (tracrRNA) (8, 9). Two sgRNAs sequences were selected per  
126 gene, one targeting each strand (Supplementary Table 2) and customized from Synthego. The  
127 *spCas9* protein and sgRNAs were combined *in vitro* to form the RNP complex which was then  
128 introduced into the ISE6 cells through nucleofection, along with the donor DNA.

129 To induce HDR, a donor DNA or DNA repair template was delivered to cells along with  
130 the sgRNA and Cas9 endonuclease (9-11). The donor DNA constructs targeting *xiap* and *p47*  
131 genes had the following features: (i) a red fluorescent protein (RFP) driven by the human  
132 elongation factor 1  $\alpha$  (EF1 $\alpha$ ) promoter; (ii) the puromycin gene for antibiotic based selection  
133 flanked by a phosphoglycerate kinase 1 (PGK) promoter; (iii) the loxp (locus of X-over P1) sites  
134 to flox out the puromycin cassette; and (iv) DNA fragments of ~600 bp in length, homologous to  
135 the *xiap* or *p47* gene locus flanking the Cas9 cleavage site on the 5' and 3' ends. The resulting  
136 plasmid was of ~7 Kb in length with the 2.5 Kb RFP-Puro cassette targeted for insertion at the  
137 *xiap* or the *p47* gene loci.

138

### 139 **CRISPR-Cas9 gene editing in tick cells**

140 To prepare the RNP, 200 pmol of Cas9-NLS-tagRFP protein (Genaxxon bioscience) and  
141 100  $\mu$ M of sgRNAs for *p47* and *xiap* (Supplementary Tables 1-2) were mixed and incubated at  
142 room temperature for 20 minutes. The RNP complexed together with 7  $\mu$ g of donor DNA was  
143 nucleofected into  $3 \times 10^7$  ISE6 cells using the EN150 pulse code and buffer SF via the 4D-  
144 Nucleofector system (Lonza Bioscience) (Figure S1). 3 days post-nucleofection, ISE6 cells were  
145 split at a 1:10 ratio and cultured for 10 days followed by another round of splitting. This process  
146 was repeated for 7 cycles (75 days) to eliminate any extraneous effect of the donor DNA. The  
147 edited cells were selected using puromycin (4  $\mu$ g/ml). The dose of puromycin was determined  
148 with a kill curve and media with fresh antibiotic was changed every other day. After puromycin  
149 selection, ISE6-edited cells were cultured without antibiotic to promote population expansion.  
150 Finally, ISE6-edited cells were maintained in ISE6 cell media with antibiotic at the concentration  
151 of 0.4  $\mu$ g/ml.

152

### 153 **Antibiotic kill curve**

154           5 x 10<sup>5</sup> ISE6 cells/well were seeded in a 12-well plate and incubated overnight at 34°C.  
155   After 24 hours, the medium was replaced with varying concentrations of puromycin ranging from  
156   0 - 10 µg/ml. Each concentration was maintained in triplicate. The medium containing puromycin  
157   was replaced every two days for a duration of 10 days. Measurement of cell viability through  
158   trypan blue determined the effect of puromycin on ISE6 cells and the kill curve was plotted  
159   (Figure S2). The lowest concentration of puromycin that completely blocked the growth of tick  
160   cells was used for the selection process.

161

### 162   **Quantitative reverse transcription polymerase chain reaction (qRT-PCR)**

163           RNA was extracted from the cells preserved in TRIzol (Invitrogen) using the PureLink  
164   RNA Mini kit (Invitrogen) and the cDNA was synthesized with the Verso cDNA Synthesis Kit  
165   using 500-800 ng of RNA (Thermo Scientific). For quantification of gene expression through  
166   qRT-PCR, 2X iTaq™ Universal SYBR® Green Supermix from Bio-rad was used. To measure  
167   gene expression, 1 µl of cDNA along with SYBR green was used and quantified using a CFX96  
168   Touch Real-Time PCR Detection System (Bio-rad). All target genes were amplified at 54°C,  
169   except for *A. phagocytophilum* 16S, which was amplified at 48°C. The qRT-PCR conditions  
170   used were: (1) 95°C for 3 minutes; (2) 33 cycles of 95°C for 10 seconds, 48 or 54°C for 30  
171   seconds; and the (3) melting curve analysis to confirm the specificity of the reaction. To ensure  
172   the absence of primer-dimer formation and/or contamination, no-template controls were  
173   incorporated into the assay. Each sample and control reactions were conducted in duplicate.  
174   Gene expression was measured using the primers listed in Supplementary Table 2.

175

### 176   **Western blotting**

177           ISE6 cells (3x10<sup>6</sup> cells per well) were plated in 6-well plates (Millipore Sigma) and  
178   stimulated accordingly. Protein lysate was prepared in Radio-immunoprecipitation assay (RIPA)

179 buffer (Merck Millipore) with a protease inhibitor cocktail (Roche) and protein concentration was  
180 estimated using BCA assay (Thermo Scientific). Sodium dodecyl sulfate polyacrylamide gel  
181 electrophoresis (SDS-PAGE) samples were prepared by boiling equal amounts of protein in 6X  
182 Laemmli sample buffer (Alfa Aesar) containing 5%  $\beta$ -mercaptoethanol. Proteins were  
183 transferred onto PVDF membranes (Biorad) and membrane was blocked for 1 hour with 5%  
184 skimmed milk prepared in PBS-T. Primary antibodies were incubated overnight at 4°C in PBS-T  
185 and blots were washed four times in PBS-T. Blots were subsequently incubated with secondary  
186 antibodies for at least 1 hour at room temperature with gentle rocking. Blots were washed four  
187 times in PBS-T, incubated with enhanced chemiluminescence (ECL) substrate solution for 1  
188 minute (Millipore), and imaged.

189

## 190 **Statistical Analysis**

191 Three independent experiments were performed for each set of experiments. Means  $\pm$   
192 standard error of the mean (SEM) was plotted, and statistical significance was assessed by the  
193 unpaired *t* test with Welch's correction or one-way analysis of variance (ANOVA). GraphPad  
194 PRISM® (GraphPad Software version 9.1.0) was used for statistical analyses and GraphPad  
195 Quickcals program was used for outlier detection  
196 (<https://www.graphpad.com/quickcalcs/Grubbs1.cfm>). A *p* value < 0.05 was considered  
197 statistically significant.



198

## Supplementary Figures

199 **Figure S1. Schematic of the ribonucleoprotein (RNP) delivery and selection in tick cells.**

200 200 pmol of the Cas9-NLS-tag RFP protein (Cas9 endonuclease tagged with nuclear  
201 localization sequence and red fluorescent protein) and 100  $\mu$ M of sgRNA 1 and 2 were mixed  
202 and incubated at room temperature to prepare the RNPs. The RNP complex together with 7  $\mu$ g  
203 of the donor DNA was nucleofected in  $3 \times 10^7$  ISE6 cells using the program code EN150 and  
204 the buffer SF on the 4D-Nucleofector System. ISE6 cells were then passaged for 7 cycles  
205 followed by puromycin selection, genomic DNA isolation and gene amplification analysis.

206

207 **Figure S2. Puromycin kill curve in tick cells.**  $0.5 \times 10^6$  ISE6 cells were seeded in a 12-well  
208 plate. After 24 hours, fresh L15C300 (Leibovitz-15 media) media with puromycin (0-10  $\mu$ g/ml)  
209 was added to the cells. ISE6 cells were replenished with fresh media and antibiotic every 48  
210 hours for 10 days. The viability of ISE6 cells was estimated using trypan blue.

211

212 **Figure S3. CRISPR-Cas9 *p47* editing in ISE6 cells.** (A) Schematic representation of the *p47*  
213 locus and the donor construct. The orange boxes represent the eight exons of the *p47* locus,  
214 and the black line represents the intron sequence (top). The purple star on exon 5 represents  
215 the sgRNA binding and Cas9 cleavage site. The donor DNA (bottom) carries the promoter and  
216 coding sequence for the red fluorescent protein (RFP)-puromycin cassette (RFP-Puro) with the  
217 loxp (locus of X-over P1) sites in the pUC19 backbone. The donor DNA construct also carries  
218 DNA fragments of  $\sim$ 600 bp in length, homologous to the *p47* gene locus, flanking the Cas9  
219 cleavage site on the 5' and 3' ends for homology-directed repair (HDR). The arrows with  
220 numbers 1-4 represent primers for gene amplification analysis. (B) PCR amplification confirming  
221 the integration of the donor cassette (RFP-Puro) in the genomic DNA prepared from *p47* edited  
222 (*p47*<sup>-/-</sup>) cells. PCR was performed using the primer pairs 1 and 2 and 3 and 4, as mentioned in  
223 (A). The genomic DNA prepared from wildtype (WT) ISE6 cells did not show any amplification.

224 The donor DNA was used as a positive control (+). The length in nucleotides of the amplified  
225 fragments is represented in numbers. (C) Editing was further confirmed through Sanger  
226 sequencing where the blue arrow is the targeted exon (Exon 5), red and dark blue arrows  
227 represent the sgRNA target sites with arrowheads showing the binding direction. The number in  
228 parenthesis is the binding location of sgRNA on the exon. The results were validated through  
229 fluorescence microscopy (D) and western blotting (E).

230

231 **Figure S4. Confirmation of *xiap* editing in ISE6 cells.** (A) PCR amplification confirming the  
232 integration of the donor cassette (RFP-Puro) in the genomic DNA prepared from *xiap* edited  
233 (*xiap*<sup>-/-</sup>) cells. PCR was performed using either the primer pairs 1 and 2 or the primer set 3 and  
234 4, as mentioned in Figure 2A. The genomic DNA prepared from wildtype (WT) ISE6 cells did not  
235 show any amplification. The donor DNA was used as a positive control (+). The length in  
236 nucleotides of the amplified fragments is represented in numbers. (B) Editing was further  
237 confirmed through Sanger sequencing where the blue arrow is the targeted exon (Exon 3), red  
238 and dark blue arrows represent the sgRNA target sites with arrowheads showing the binding  
239 direction. The number in parenthesis is the binding location of sgRNA on the exon.

240

241 **Figure S5. The IMD pathway in ticks.** The binding of the infection-derived lipid POPG to  
242 Croquemort (Crq), relays a signal to TAK1 through an unknown mechanism. This cascade of  
243 events results in the polyubiquitylation of p47 in a K63-dependent manner by the E3 ubiquitin  
244 ligase XIAP leading to the cleavage and translocation of Relish into the nucleus. The  
245 transcription factor Relish promotes expression of the antimicrobial peptide ctenidin-1,  
246 enhancing the tick antibacterial response.

247

248

249

250

## References

- 251 1. McClure Carroll EE, Wang X, Shaw DK, O'Neal AJ, Oliva Chavez AS, Brown LJ, Boradia  
252 VM, Hammond HL, Pedra JHF. 2019. p47 licenses activation of the immune deficiency  
253 pathway in the tick *Ixodes scapularis*. Proc Natl Acad Sci U S A 116:205-210.
- 254 2. Carlyon JA. 2005. Laboratory maintenance of *Anaplasma phagocytophilum*. Curr Protoc  
255 Microbiol Chapter 3:Unit 3A 2.
- 256 3. Yoshiie K, Kim HY, Mott J, Rikihisa Y. 2000. Intracellular infection by the human  
257 granulocytic ehrlichiosis agent inhibits human neutrophil apoptosis. Infect Immun  
258 68:1125-33.
- 259 4. Labandeira-Rey M, Skare JT. 2001. Decreased infectivity in *Borrelia burgdorferi* strain  
260 B31 is associated with loss of linear plasmid 25 or 28-1. Infect Immun 69:446-55.
- 261 5. Zuckert WR. 2007. Laboratory maintenance of *Borrelia burgdorferi*. Curr Protoc  
262 Microbiol Chapter 12:Unit 12C 1.
- 263 6. O'Neal AJ, Singh N, Rolandelli A, Laukaitis HJ, Wang X, Shaw DK, Young BD,  
264 Narasimhan S, Dutta S, Snyder GA, Samaddar S, Marnin L, Butler LR, Mendes MT,  
265 Cabrera Paz FE, Valencia LM, Sundberg EJ, Fikrig E, Pal U, Weber DJ, Pedra JHF.  
266 2023. Croquemort elicits activation of the immune deficiency pathway in ticks. Proc Natl  
267 Acad Sci U S A 120:e2208673120.
- 268 7. Abcam. 2022. Subcellular fractionation protocol.
- 269 8. Gasiunas G, Barrangou R, Horvath P, Siksnys V. 2012. Cas9-crRNA ribonucleoprotein  
270 complex mediates specific DNA cleavage for adaptive immunity in bacteria. Proc Natl  
271 Acad Sci U S A 109:E2579-86.
- 272 9. Ran FA, Hsu PD, Wright J, Agarwala V, Scott DA, Zhang F. 2013. Genome engineering  
273 using the CRISPR-Cas9 system. Nat Protoc 8:2281-2308.

- 274 10. Yang L, Yang JL, Byrne S, Pan J, Church GM. 2014. CRISPR/Cas9-directed genome  
275 editing of cultured cells. *Curr Protoc Mol Biol* 107:31 1 1-17.
- 276 11. Gantz VM, Bier E. 2015. Genome editing. The mutagenic chain reaction: a method for  
277 converting heterozygous to homozygous mutations. *Science* 348:442-4.

278

279

**Supplementary Table 1: Resources and reagents available**

| <b>Antibody</b>                                                   | <b>Source</b>     | <b>Identifier</b>     | <b>Dilution/Concentration</b> |
|-------------------------------------------------------------------|-------------------|-----------------------|-------------------------------|
| Mouse Anti- <i>I. scapularis</i> Relish monoclonal Ab             | GenScript         | custom                | 1:500                         |
| Histone H3 Rabbit polyclonal Ab                                   | Cell Signaling    | 9715                  | 1:1,000                       |
| GAPDH (14C10) Rabbit mAb                                          | Cell Signaling    | 2118S                 | 1:1,000                       |
| Goat Anti-Rabbit IgG H&L (HRP)                                    | Abcam             | ab97051               | 1:4,000-10,000                |
| Rabbit Anti-Mouse Actin                                           | Millipore Sigma   | A2103                 | 1:4,000                       |
| HA-Tag (C29F4) Rabbit mAb                                         | Cell Signaling    | 3724                  | 1:1,000                       |
| Anti-Flag                                                         | Millipore Sigma   | F3165                 | 1:1,000                       |
| Anti-NSFL1C mouse monoclonal Ab                                   | Abnova            | H00055968-B01P        | 1:500                         |
| Rat monoclonal [H139-52.1] Anti-Mouse kappa light chain (HRP)     | Abcam             | ab99632; discontinued | 1:4,000                       |
| Rabbit Anti- <i>I. scapularis</i> XIAP polyclonal Ab              | Thermo Scientific | custom                | 1:1,000                       |
| Rabbit Anti- <i>I. scapularis</i> Kenny polyclonal Ab             | GenScript         | custom                | 1: 1,000                      |
| Goat Anti-mouse IgG H+L(HRP)                                      | Elabscience       | E-AB-1001             | 1:3,000                       |
| <b>Cell Dye</b>                                                   |                   |                       |                               |
| CellBrite™ Fix membrane stain                                     | Biotium           | 30090                 | 1:1,000                       |
| Hoechst 33342 Nuclear Stain                                       | AAT Bioquest      | 17533                 | 1:1,000                       |
| SlowFade Gold Antifade mountant                                   | Invitrogen        | S36938                | N/A                           |
| CytoPainter LysoGreen indicator reagent                           | Abcam             | ab176826              | 1:1,000                       |
| BioTracker™ 488 Green Mitochondria dye                            | Millipore         | SCT136                | 1:1,000                       |
| Cell Navigator™ TMR Ceramide Golgi staining kit- red fluorescence | AAT Bioquest      | 22752                 | 1:1,000                       |

|                                                  |                     |             |         |
|--------------------------------------------------|---------------------|-------------|---------|
| CytoPainter ER staining kit - green fluorescence | Abcam               | ab139481    | 1:1,000 |
| <b>Restriction Enzymes</b>                       |                     |             |         |
| <i>SacI</i> -HF®                                 | New England BioLabs | R3156S      | N/A     |
| <i>EcoRI</i> -HF®                                | New England BioLabs | R3101S      | N/A     |
| <i>BamHI</i> -HF®                                | New England BioLabs | R3136S      | N/A     |
| <i>Sall</i> -HF®                                 | New England BioLabs | R3138S      | N/A     |
| <b>Cell Media</b>                                |                     |             |         |
| Leibovitz's L-15 Medium, powder                  | Gibco               | 41300039    | N/A     |
| L-aspartic acid                                  | Millipore-Sigma     | 11189       | 3.37 mM |
| L-glutamine                                      | Millipore-Sigma     | G8540       | 3.42 mM |
| L-proline                                        | Millipore-Sigma     | 81709       | 3.9 mM  |
| L-glutamic acid                                  | Millipore-Sigma     | 49449       | 1.7 mM  |
| $\alpha$ -ketoglutaric acid                      | Millipore-Sigma     | K1128       | 3.07 mM |
| Sodium hydroxide                                 | Millipore-Sigma     | S8045       | 10 N    |
| D-glucose                                        | Millipore-Sigma     | G7021       | 100 mM  |
| FBS (USDA approved; for tick medium)             | Millipore-Sigma     | F0926-500ML | 10%     |
| Bacto™ Tryptose Phosphate Broth                  | BD                  | 260300      | 10%     |
| Lipoprotein concentrate                          | MP Biomedicals      | 191476      | 0.10%   |
| Normal rabbit serum                              | Pel-Freez           | #31126-5    | 6.00%   |
| Sodium bicarbonate                               | Millipore-Sigma     | S6014       | 0.25%   |
| HEPES                                            | Millipore-Sigma     | H4034       | 25 mM   |
| CMRL1066 w/L-Glutamine (Powder)                  | US Biological       | C5900       | N/A     |
| Sodium citrate tribasic dihydrate                | Millipore-Sigma     | S4641       | 2.38 mM |
| Yeastolate                                       | BD                  | 255772      | 2 g/L   |
| Neopeptone                                       | BD                  | 211681      | 5 g/L   |
| N-Acetyl- $\alpha$ -D-glucosamine                | Millipore-Sigma     | 1079-25GM   | N/A     |

|                                                            |                     |             |             |
|------------------------------------------------------------|---------------------|-------------|-------------|
| Albumin, Bovine Fraction V                                 | MP Biomedicals      | 160069      | N/A         |
| Rifampicin                                                 | Millipore-Sigma     | 557303      | 50 µg/ml    |
| Phosphomycin                                               | Millipore-Sigma     | P5396       | 100 µg/ml   |
| Amphotericin B                                             | Gibco               | 15290-026   | 0.111111111 |
| Sodium pyruvate                                            | Millipore-Sigma     | P5280       | 7.3 mM      |
| RPMI-1640 Medium With L-Glutamine                          | Quality Biological  | 112-025-101 | N/A         |
| Fetal Bovine Serum (for HL-60s media)                      | Gemini Bio-Products | 100-106     | 10 %        |
| 1X PBS                                                     | Quality Biological  | 114-058-101 | N/A         |
| Distilled water                                            | Gibco               | 15-230-147  | N/A         |
| LB broth                                                   | Millipore-Sigma     | L3022       | N/A         |
| LB agar with 100 µg/ml ampicillin                          | Quality Biological  | 50-751-7582 | N/A         |
| Ampicillin                                                 | Millipore-Sigma     | A0166       | 100 µg/ml   |
| <b>Reagents and Materials</b>                              |                     |             |             |
| Cellstar® cell culture flasks, 25 cm <sup>2</sup>          | Greiner bio-one     | 690-160     | N/A         |
| T-25 Vented Flasks                                         | CytoOne             | CC7682-4825 | N/A         |
| Cell culture plate with lid (6 well, flat bottom)          | Millipore-Sigma     | SIAL0516    | N/A         |
| iTaq™ Universal SYBR® Green Supermix                       | Biorad              | 1725121     | N/A         |
| Costar® cell culture plate with lid (24 well, flat bottom) | Corning             | CLS3526-1EA | N/A         |
| Mini-Protean® TGX™ gels                                    | Biorad              | 456-9034    | N/A         |
| Trans-blot® Turbo™ Transfer pack, 0.2 µm PVDF              | Biorad              | 1704156     | N/A         |
| Miller GP 0.2 µm filter unit                               | Millipore-Sigma     | SLGP033RS   | N/A         |
| FALCON® 14 ml polypropylene round-bottom tube              | Corning             | 352059      | N/A         |
| Nunc™ 96-Well polystyrene round bottom microwell plates    | Thermo Scientific   | 262162      | N/A         |
| 250 mm glass desiccator                                    | Fisher Scientific   | 08-615B     | N/A         |
| 1.5 ml microcentrifuge tubes                               | Thomas Scientific   | 1148T71     | N/A         |

|                                                      |                    |           |         |
|------------------------------------------------------|--------------------|-----------|---------|
| 15 ml conical screw cap tubes                        | USA Scientific     | 5618-8261 | N/A     |
| 50 ml conical screw cap tubes                        | USA Scientific     | 5622-7270 | N/A     |
| 500 ml vacuum filter/storage bottle system, 0.2 µm   | Corning            | 430773    | N/A     |
| 27 gauge, 1/2" needle                                | BD                 | 305109    | N/A     |
| White filter paper for CytoSep™ single funnel        | Simport Scientific | M965FW    | N/A     |
| Richard-Allan Scientific™ three-step stain set       | Thermo Scientific  | 3300      | N/A     |
| Epredia™ Cytospin™ 4 cytocentrifuge                  | Thermo Scientific  | A78300003 | N/A     |
| Fisherbrand™ Superfrost™ plus microscope slides      | Thermo Scientific  | 12-550-15 | N/A     |
| Halt™ phosphatase inhibitor cocktail (100x)          | Thermo Scientific  | 78426     | 1:100   |
| Halt™ protease inhibitor cocktail (100x)             | Thermo Scientific  | 87786     | 1:100   |
| 10X RIPA                                             | Millipore-Sigma    | 20-188    | 1X      |
| Chloroform                                           | Millipore-Sigma    | 288306    | 100%    |
| TRIzol reagent                                       | Ambion             | 15596018  | N/A     |
| Methanol anhydrous, 99.8%                            | Millipore-Sigma    | 322415-1L | 100%    |
| Ethyl alcohol, pure; 200 proof for molecular biology | Millipore-Sigma    | E7023-1L  | 70-100% |
| HyClone™ water, molecular biology grade              | Cytiva             | SH3053801 | N/A     |
| Puromycin dihydrochloride                            | Millipore-Sigma    | P9620     | 4 µg/ml |
| Pierce™ Anti-dykdddk affinity resin                  | Thermo Scientific  | A36803    | N/A     |
| Pierce™ IP lysis buffer                              | Thermo Scientific  | 87787     | N/A     |
| 2-β mercaptoethanol                                  | Gibco              | 21985-023 | 5%      |
| 6X Laemmli buffer                                    | Alfa Aesar         | J60660    | 1X      |
| Blocking grade blocker, non-fat skim milk            | Biorad             | 1706404   | 5%      |
| Bovine serum albumin                                 | Millipore-Sigma    | A2058     | 3%      |
| Sodium dodecyl sulfate (SDS)                         | Millipore-Sigma    | L6026     | 0.10%   |



|                                                    |                                           |              |        |
|----------------------------------------------------|-------------------------------------------|--------------|--------|
| Paraformaldehyde                                   | Millipore-Sigma                           | P6148        | 4.00%  |
| JumpStart™ REDTaq® ReadyMix™ Reaction Mix          | Millipore Sigma                           | P1107        | 1X     |
| Phusion® HF DNA Polymerase                         | New England BioLabs                       | M0530S       | 1 unit |
| <b>Commercial Assays</b>                           |                                           |              |        |
| Pure Link RNA mini kit                             | Invitrogen                                | 12183025     | N/A    |
| SF Cell Line 4D-Nucleofector™ X Kit L              | Lonza Bioscience                          | V4XC-2012    | N/A    |
| Verso cDNA Synthesis Kit                           | Thermo Scientific                         | AB-1453B     | N/A    |
| Pierce BCA Protein Assay Kit                       | Thermo Scientific                         | 23227        | N/A    |
| Pierce ECL Western Blotting Substrate              | Thermo Scientific                         | 32106        | N/A    |
| DNeasy® Blood and Tissue kit                       | Qiagen                                    | 69506        | N/A    |
| QIAamp® DNA Mini Kit                               | Qiagen                                    | 51304        | N/A    |
| QIAprep® Spin Miniprep Kit                         | Qiagen                                    | 27106        | N/A    |
| <i>Mycoplasma</i> testing kit                      | Southern Biotech                          | 13100-01     | N/A    |
| Endofree Plasmid Maxi Kit                          | Qiagen                                    | QGN-12362    | N/A    |
| Immobilon Forte Western HRP substrate              | Millipore-Sigma                           | WBLUF0100    | N/A    |
| <b>Equipment</b>                                   |                                           |              |        |
| 4D-Nucleofector™ System                            | Lonza Bioscience                          | AAF-1002     | N/A    |
| Cytospin 4                                         | Thermo Scientific                         | A78300003    | N/A    |
| CFX96 Touch Real-Time PCR Detection System         | Biorad                                    | Discontinued | N/A    |
| C1000 Touch Thermocycler                           | Biorad                                    | 1851148      | N/A    |
| <b>Cell Lines</b>                                  |                                           |              |        |
| <i>I. scapularis</i> ISE6 cells                    | Ulrike Munderloh, University of Minnesota |              | ISE6   |
| <b>Organisms</b>                                   |                                           |              |        |
| One Shot Top10 Chemically Competent <i>E. coli</i> | Thermo Scientific                         | C404003      | N/A    |
| HL-60 cells                                        | ATCC                                      | CCL-240      | NA     |
| <i>A. phagocytophilum</i> HZ strain                | Ulrike Munderloh, University of Minnesota |              | N/A    |

|                                     |                                                          |            |     |
|-------------------------------------|----------------------------------------------------------|------------|-----|
| <i>B. burgdoferi</i> B31 clone MSK5 | Jon Skare, Texas A&M University<br>Health Science Center |            | N/A |
| <b>Plasmids</b>                     |                                                          |            |     |
| pAQUA-N1                            | Addgene                                                  | 42888      | N/A |
| pCMV-HA                             | Addgene                                                  | 32530      | N/A |
| pCMV-FLAG                           | Sino Biological, Inc                                     | CV002      | N/A |
| DsRed-N1                            | Addgene                                                  | 54493      | N/A |
| Donor vectors                       | Origene<br>Technologies                                  | custom     | N/A |
| <b>Protein</b>                      |                                                          |            |     |
| Cas9-NLS-tagRFP protein             | Genaxxon bioscience                                      | S5306.0010 | N/A |

280

281

Supplementary Table 2: Primers used

| Name                                | Type    | Target Accession | Start position within mRNA or exon | Strand | Sequences (5'-3')                              |
|-------------------------------------|---------|------------------|------------------------------------|--------|------------------------------------------------|
| <i>pCMV-xiap-HA</i> <sup>*fl</sup>  | Cloning | XM_002433822     | 1                                  | F      | GATTGCAGGAATTCATGGTTGTCAT<br>CAGTATGGCG        |
|                                     |         |                  | 1014                               | R      | GTATAGTTGCGGCCGCTCATGAAA<br>GAAAAGCCTTAATGTTCT |
| <i>pCMV-p47-FLAG</i> <sup>*fl</sup> | Cloning | XM_002433590     | 27                                 | F      | GGCCGAATTCATGGCAGATTGTGC<br>GGGGCG             |
|                                     |         |                  | 1175                               | R      | GGCCGTCGACTCACTTGATACGCT<br>GGACGATAA          |
| <i>xiap-Dsred2-N1</i> <sup>fl</sup> | Cloning | XM_002433822     | 1                                  | F      | ACTCAGATCTCGAGCTCGATGGTT<br>GTCATCAGTATGGCGATC |
|                                     |         |                  | 1014                               | R      | CGTCGACTGCAGAATTCCTGAAAG<br>AAAAGCCTTAATGTTCTC |
| <i>p47-AquaN1</i> <sup>fl</sup>     | Cloning | XM_002433590     | 27                                 | F      | ATTCTGCAGTCGACGGATGGCGGA<br>CTGCGAGGAAC        |
|                                     |         |                  | 1175                               | R      | GCGACCGGTGGATCCCCTTTTATA<br>CGCTGCACAATG       |
| <i>p47</i>                          | PCR     | XM_002433590     | NA                                 | LHA-F  | TGGTAGCTAAAGGCCTACAC                           |
|                                     |         |                  |                                    | RHA-R  | GTCCTCACAAAGGGCAAAGG                           |
| <i>xiap</i>                         | PCR     | XM_002433822     | NA                                 | LHA-F  | TGGCGGTACCTTCCCAAATC                           |
|                                     |         |                  |                                    | RHA-R  | AGTGTGCAACGGGATGCTAC                           |
| donor cassette                      | PCR     | NA               | NA                                 | Puro-F | GCCTCTGTTCCACATACACTTC                         |
|                                     |         |                  |                                    | RFP-R  | GATGCCCTGGGTGTGGTTGATG                         |
| <i>p47 sgRNA</i>                    | sgRNA   | LOC120845803     | 498                                | F      | CTGTACGGAGAACGACACAG                           |

|                                    |         |                |      |              |                             |
|------------------------------------|---------|----------------|------|--------------|-----------------------------|
|                                    |         |                | 468  | R            | AGCAGCGGTCATCGCGCAAC        |
| <b><i>xiap</i> sgRNA</b>           | sgRNA   | LOC8050569     | 259  | F            | AAGGCGGGACTTTTTTACAA        |
|                                    |         |                | 228  | R            | TCGGCGACGAGTACGTACAG        |
| <b>A. phagocytophilum 16S rRNA</b> | qRT-PCR | NC_007797      | 283  | Ap16S_F      | CAGCCACACTGGAAGTACTGAGA     |
|                                    |         |                | 400  | Ap16S_R      | CCCTAAGGCCTTCCTCACTC        |
| <b><i>I. scapularis</i> p47</b>    | qRT-PCR | XM_040217354.2 | 93   | p47_F        | GCCAGGGCCAAGCTTTACC         |
|                                    |         |                | 190  | p47_R        | CTTGGACGCTCCAGCGAC          |
| <b><i>I. scapularis</i> kenny</b>  | qRT-PCR | XM_040500911.2 | 1169 | Key_F        | GCTCAGGACTTGGCAGGAAT        |
|                                    |         |                | 1300 | Key_R        | CACCAGCTTGTCTTGGACCT        |
| <b><i>I. scapularis</i> relish</b> | qRT-PCR | XM_040501061.2 | 487  | Relish_F     | AGAATGTCCGCCACCGTTTTTTTCTGC |
|                                    |         |                | 595  | Relish_R     | CACGTGCACCGCCTCACCATGAAGG   |
| <b><i>I. scapularis</i> actin</b>  | qRT-PCR | XM_029977298   | 896  | I.s. actin_F | GGTCATCACAATCGGCAAC         |
|                                    |         |                | 1003 | I.s. actin_R | ATGGAGTTGTACGTGGTCTC        |

282 \*Constructs used in McClure Carroll *et al.*, 2019

283 †Bold letters are introduced restriction endonucleases

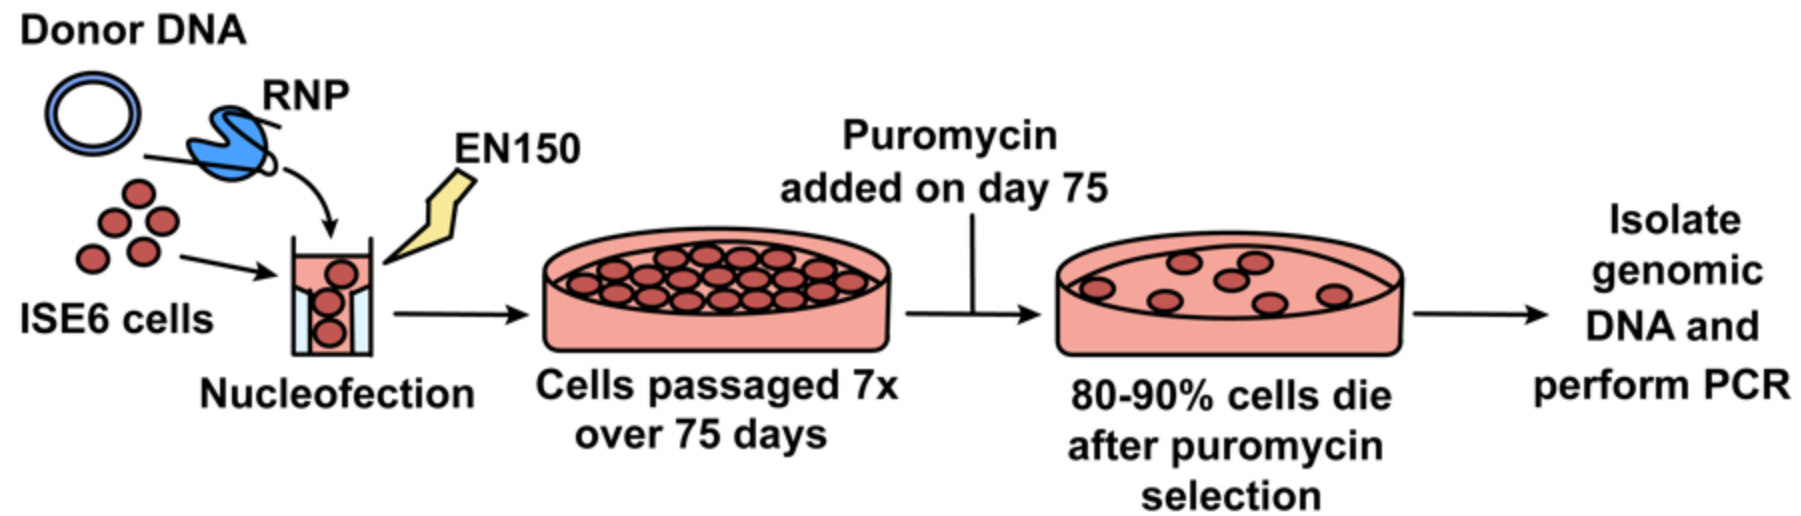

Singh *et al.* Figure S1

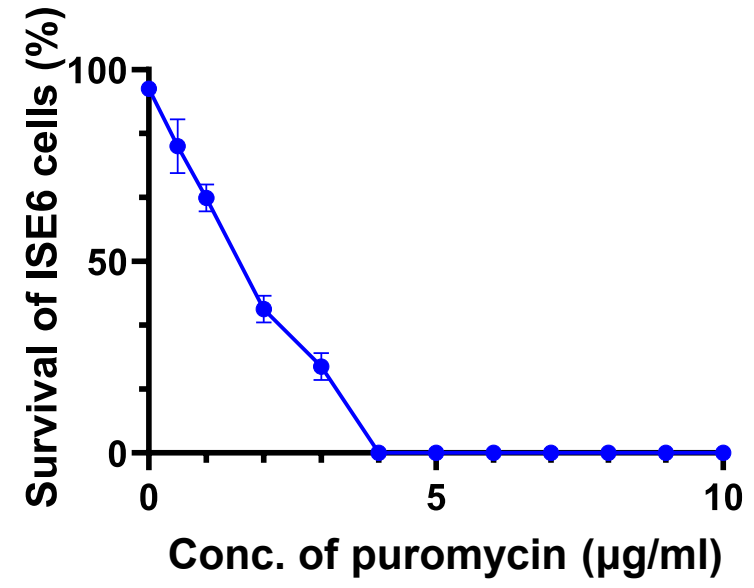

Singh *et al.* Figure S2

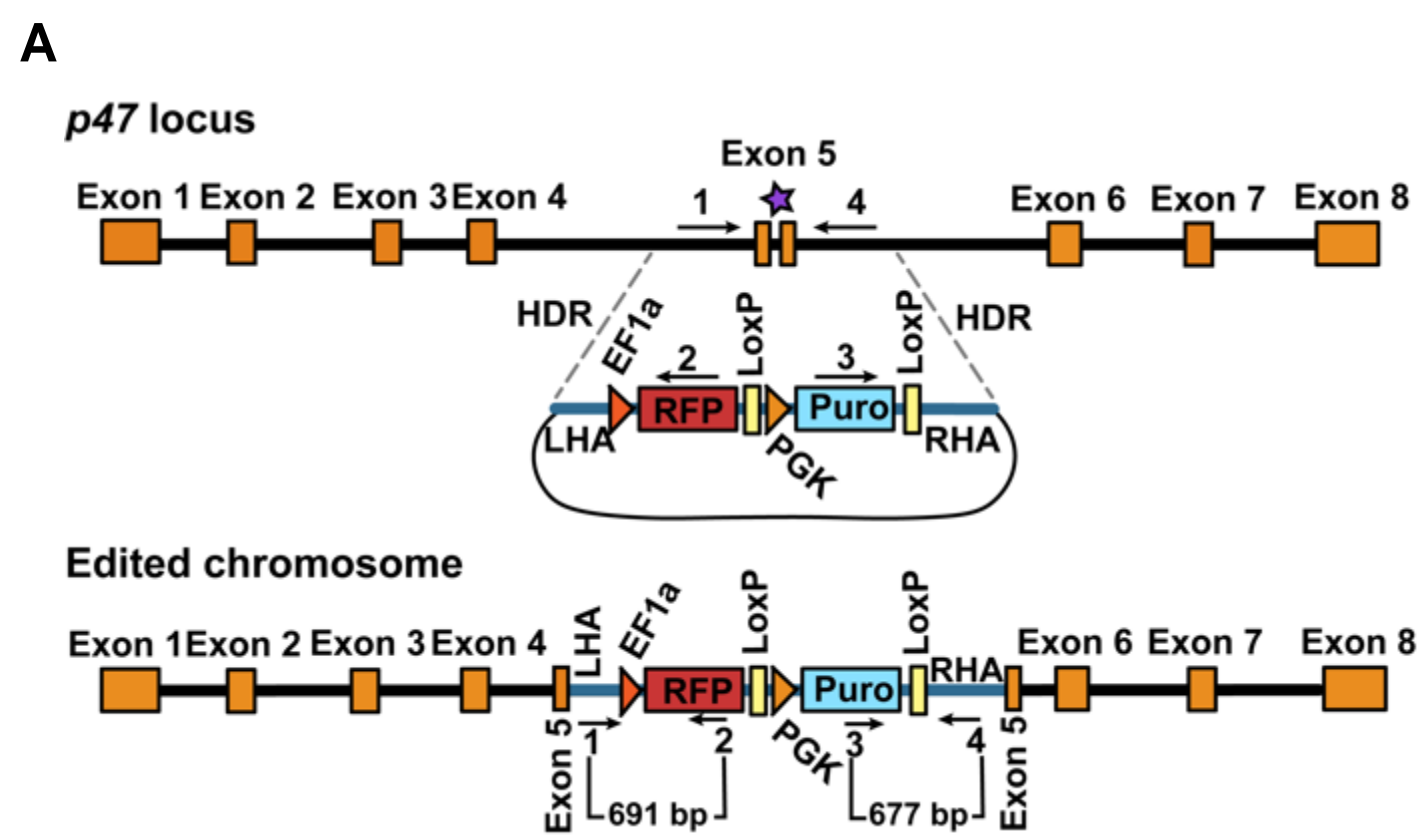

**B**

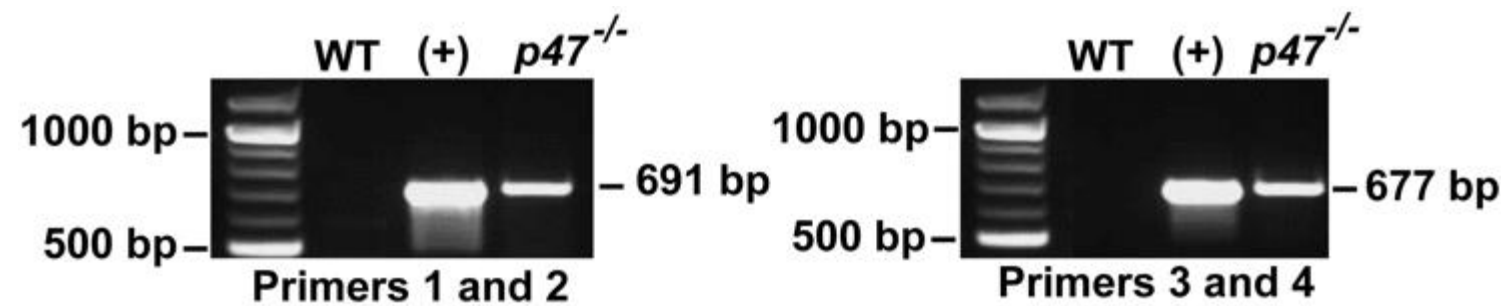

**C**

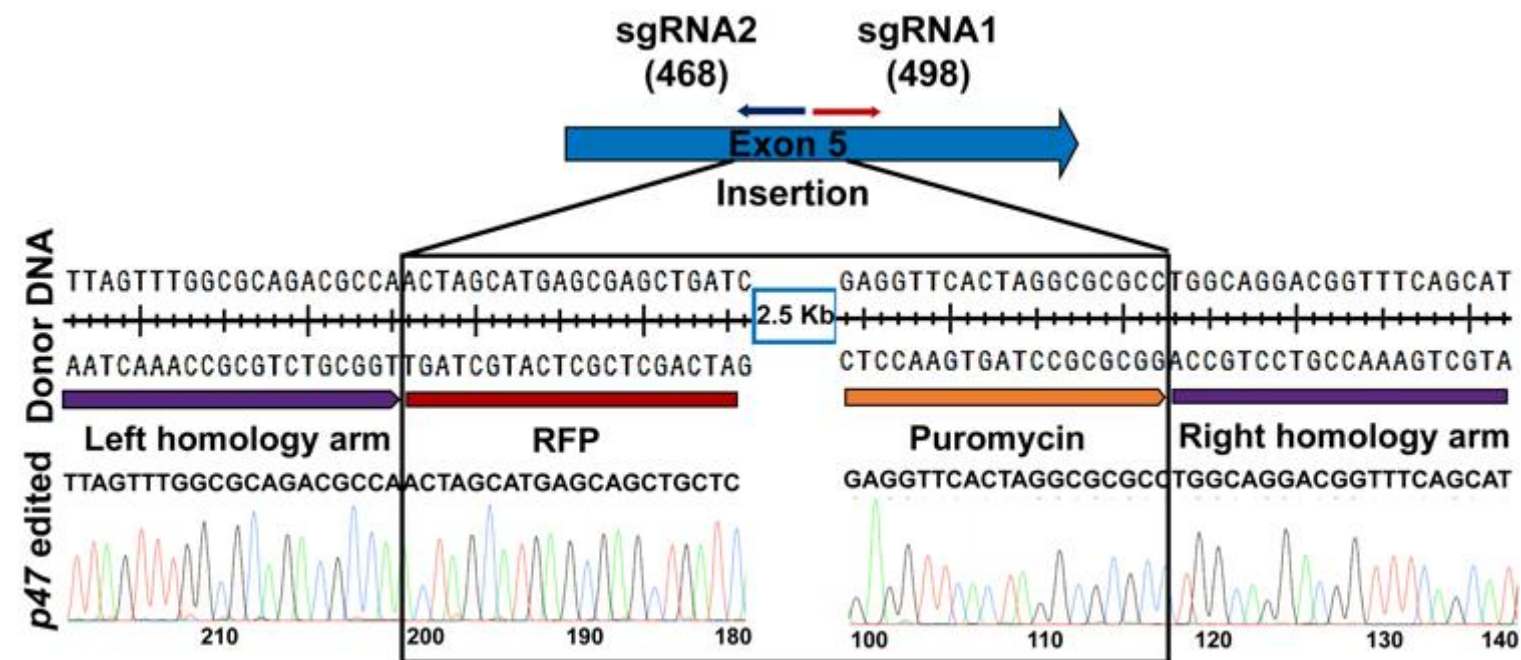

**D**

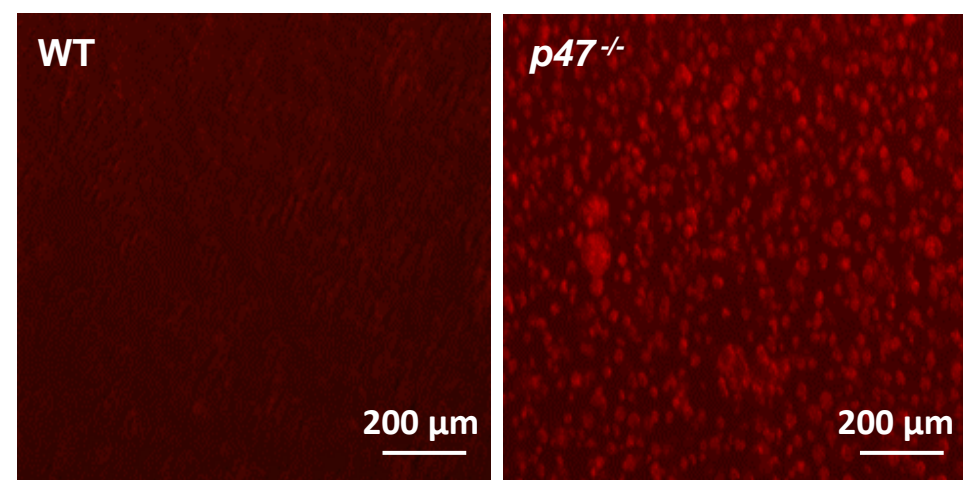

**E**

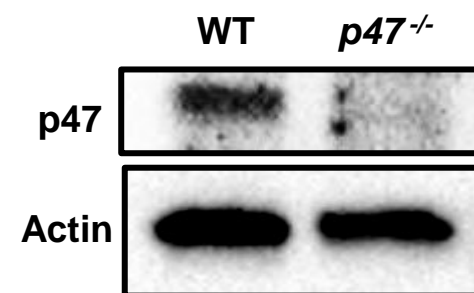

**A**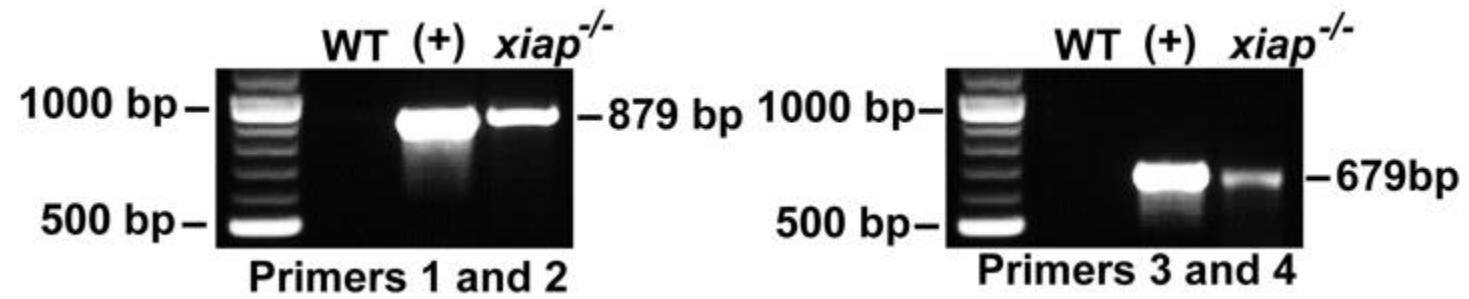**B**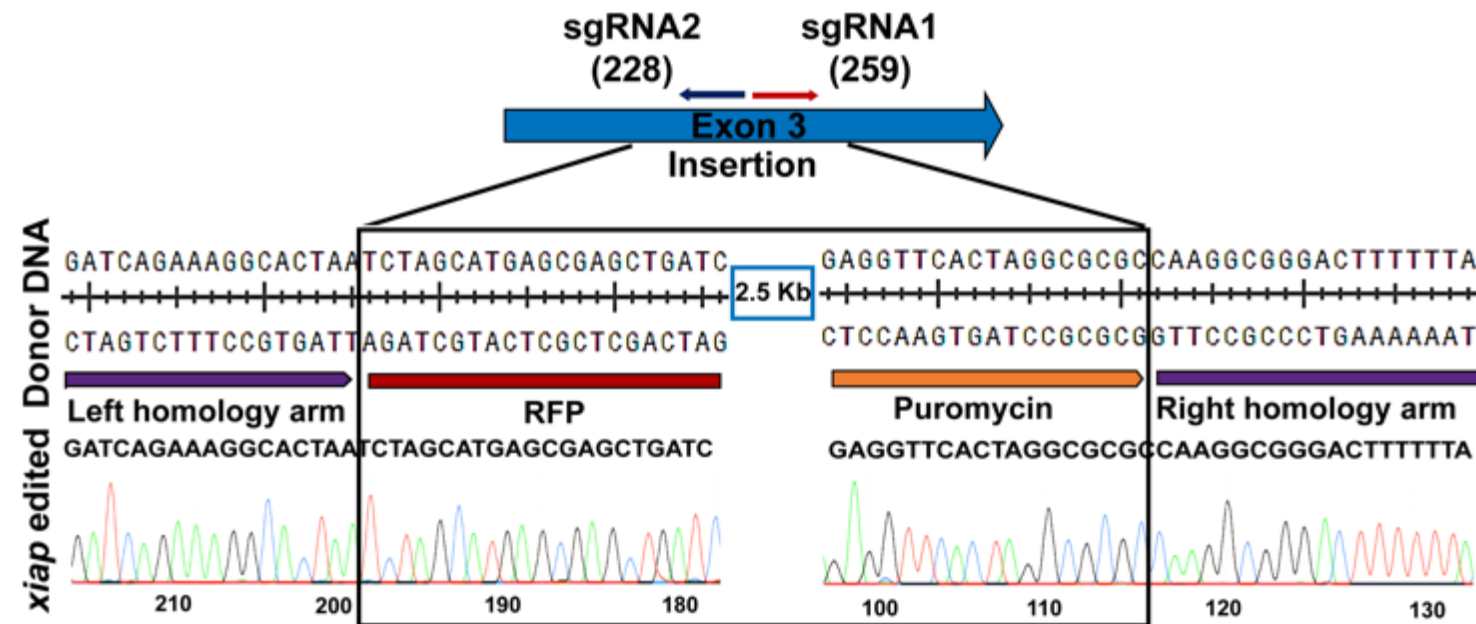



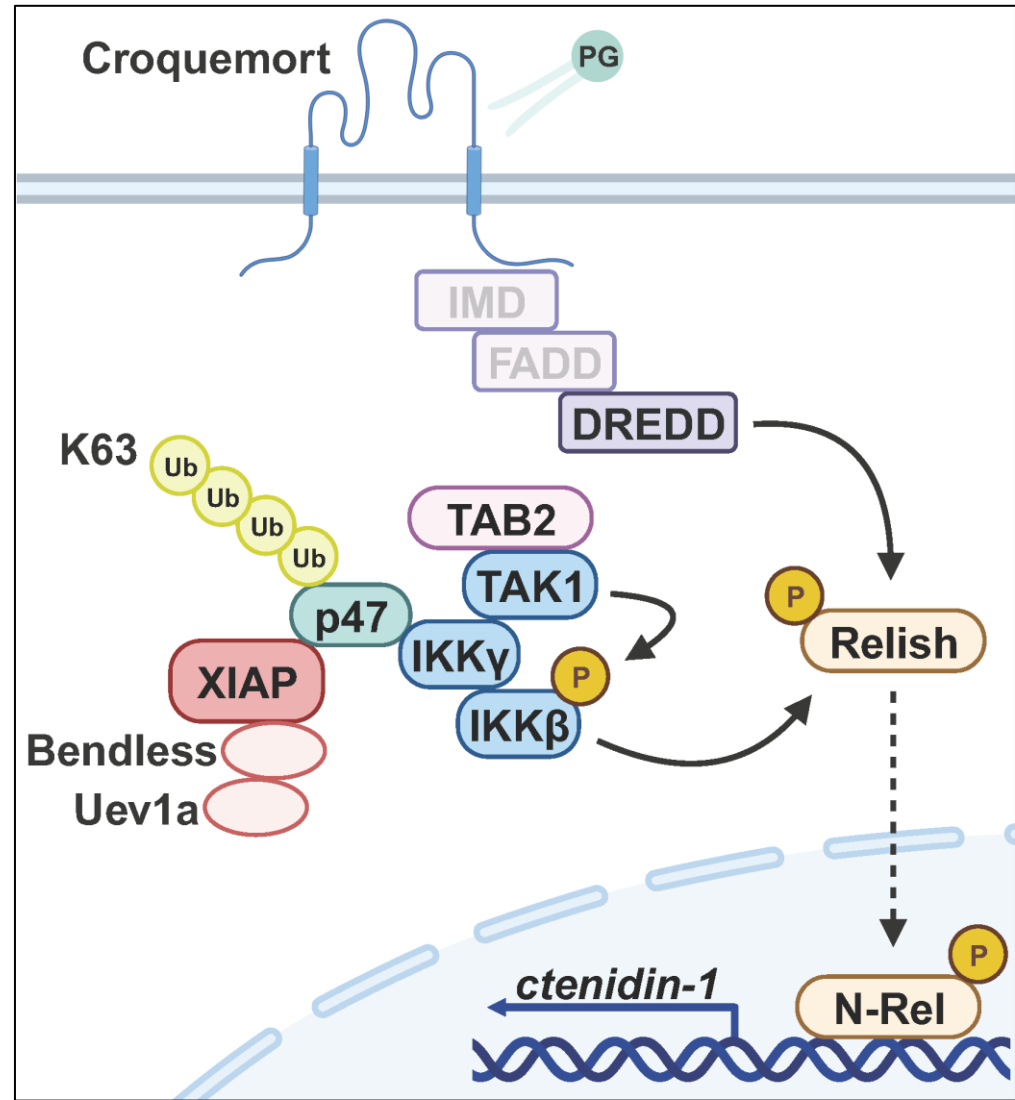

Singh *et al.* Figure S5
